# Supplementary material for: Linking glacier retreat with climate change on the Tibetan Plateau through satellite remote sensing
Source: Copernicus journal article supplement (doi:10.5194/tc-18-5595-2024), 2024-12-03
Supplement: Supplementary file 1 [file tc-18-5595-2024-supplement.pdf]

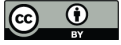

*Supplement of*

## **Linking glacier retreat with climate change on the Tibetan Plateau through satellite remote sensing**

**Fumeng Zhao et al.**

*Correspondence to:* Wenping Gong ([wenpinggong@cug.edu.cn](mailto:wenpinggong@cug.edu.cn))

The copyright of individual parts of the supplement might differ from the article licence.

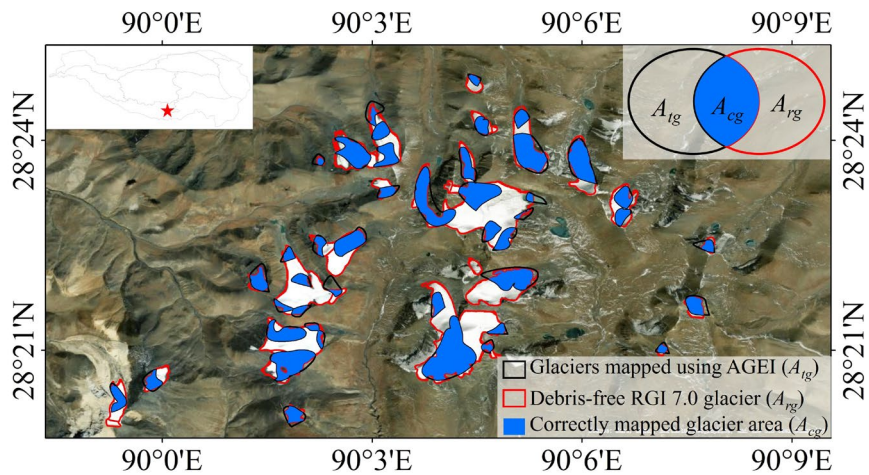

**Figure S1: Accuracy of the mapped debris-free glaciers for a specific site. The base map is the Google Earth images from the © Google Earth 2020.**

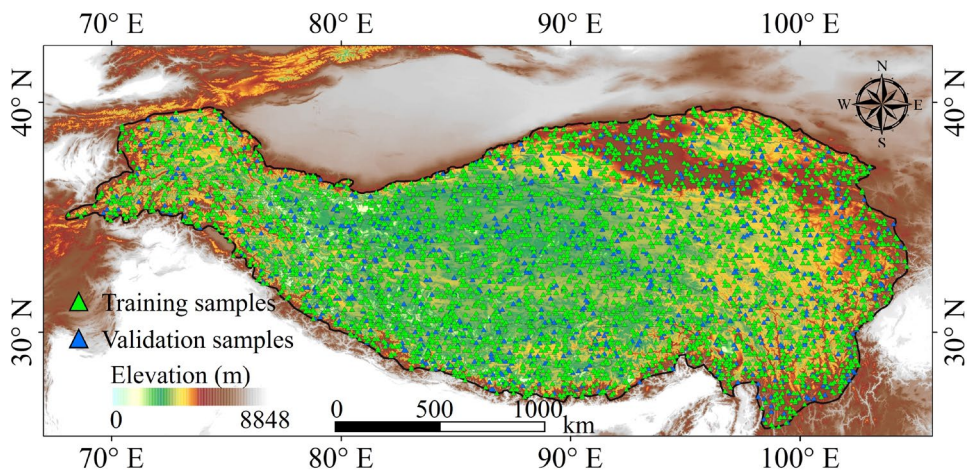

**Figure S2: Locations of the training and validation samples for the ERA5-Land downscaling analysis: the number of training and validation samples are 4000 and 1000. The background image is the topographic map from the Shuttle Radar Topographic Mission (SRTM) Digital elevation model (DEM) provided by the USGS EROS Archive (EROS Centre, 2018).**

**Table S1: Linear regression results between the 2-m air temperature and the glacier area change**

|        | Zone | Coefficient<br>(10 <sup>3</sup> km <sup>2</sup> /°C) | Standard<br>error | t-values | p-values | 95%<br>LCL | 95%<br>UCL | R <sup>2</sup> | Adjusted<br>R <sup>2</sup> | RSE  |
|--------|------|------------------------------------------------------|-------------------|----------|----------|------------|------------|----------------|----------------------------|------|
| Annual | I    | -0.04                                                | 0.02              | -1.47    | 0.19     | -0.11      | 0.03       | 0.30           | 0.16                       | 0.01 |
|        | II   | -1.67                                                | 0.94              | -1.77    | 0.13     | -4.08      | 0.74       | 0.38           | 0.26                       | 1.64 |
|        | III  | -1.53                                                | 1.36              | -1.12    | 0.31     | -5.04      | 1.97       | 0.20           | 0.04                       | 2.42 |
|        | IV   | -0.20                                                | 0.15              | -1.42    | 0.21     | 0.13       | -0.54      | 0.28           | 0.14                       | 0.44 |
|        | V    | -0.03                                                | 0.32              | -0.10    | 0.91     | -0.87      | 0.80       | 0.01           | -0.19                      | 0.62 |
|        | VI   | -5.76                                                | 3.93              | -1.46    | 0.20     | -15.86     | 4.36       | 0.29           | 0.15                       | 3.28 |
|        | VII  | -0.28                                                | 0.27              | -1.00    | 0.36     | -0.98      | 0.43       | 0.16           | 0.01                       | 0.36 |
|        | VIII | -9.34                                                | 2.28              | -4.07    | 0.01     | -15.19     | -3.43      | 0.76           | 0.72                       | 2.90 |
| Fall   | I    | -0.04                                                | 0.02              | -2.21    | 0.07     | -0.09      | 0.01       | 0.49           | 0.399                      | 0.04 |
|        | II   | -1.48                                                | 1.01              | -1.45    | 0.20     | -4.09      | 1.13       | 0.30           | 0.18                       | 1.76 |
|        | III  | -1.61                                                | 0.85              | -1.89    | 0.11     | -3.80      | 0.57       | 0.42           | 0.30                       | 2.06 |
|        | IV   | -0.14                                                | 0.07              | -2.13    | 0.08     | -0.32      | 0.03       | 0.48           | 0.37                       | 0.38 |
|        | V    | -0.14                                                | 0.16              | -0.86    | 0.42     | -0.56      | 0.28       | 0.13           | -0.05                      | 0.57 |
|        | VI   | 2.91                                                 | 2.63              | 1.10     | 0.31     | -3.86      | 9.69       | 0.19           | 0.04                       | 3.52 |
|        | VII  | -0.23                                                | 0.15              | -1.47    | 0.19     | -0.63      | 0.17       | 0.30           | 0.16                       | 0.33 |
|        | VIII | -2.21                                                | 3.13              | -0.70    | 0.51     | -10.28     | 5.85       | 0.09           | -0.09                      | 5.75 |
| Winter | I    | -0.01                                                | 0.01              | -0.68    | 0.52     | -0.05      | 0.03       | 0.08           | -0.10                      | 0.06 |
|        | II   | -0.620                                               | 0.38              | -1.62    | 0.16     | -1.60      | 0.36       | 0.34           | 0.21                       | 1.70 |
|        | III  | -0.37                                                | 0.69              | -0.54    | 0.61     | -2.17      | 1.41       | 0.05           | -0.13                      | 2.63 |
|        | IV   | -0.10                                                | 0.09              | -1.08    | 0.32     | -0.35      | 0.14       | 0.19           | 0.03                       | 0.47 |
|        | V    | -0.10                                                | 0.18              | -0.57    | 0.58     | -0.58      | 0.36       | 0.06           | -0.13                      | 0.60 |
|        | VI   | -4.56                                                | 1.82              | -2.49    | 0.05     | -9.26      | 0.13       | 0.55           | 0.46                       | 2.61 |
|        | VII  | 0.07                                                 | 0.16              | 0.45     | 0.66     | -0.35      | 0.50       | 0.04           | -0.15                      | 0.39 |
|        | VIII | -5.16                                                | 2.09              | -2.46    | 0.05     | -10.55     | 0.22       | 0.54           | 0.45                       | 4.05 |
| Spring | I    | -0.02                                                | 0.03              | -0.96    | 0.38     | -0.10      | 0.05       | 0.16           | -0.01                      | 0.06 |
|        | II   | -1.28                                                | 1.19              | -1.07    | 0.33     | -4.34      | 1.78       | 0.19           | 0.02                       | 1.89 |

|      |        |       |       |       |       |        |       |       |       |       |      |
|------|--------|-------|-------|-------|-------|--------|-------|-------|-------|-------|------|
|      | III    | -0.72 | 1.70  | -0.42 | 0.68  | -5.10  | 3.643 | 0.04  | -0.16 | 2.66  |      |
|      | IV     | -0.04 | 0.15  | -0.30 | 0.77  | -0.43  | 0.34  | 0.02  | -0.18 | 0.52  |      |
|      | V      | 0.24  | 0.26  | 0.91  | 0.40  | -0.43  | 0.92  | 0.14  | -0.03 | 0.57  |      |
|      | VI     | -1.04 | 2.00  | -0.52 | 0.62  | -6.19  | 4.10  | 0.05  | -0.14 | 3.82  |      |
|      | VII    | -0.22 | 0.18  | -1.20 | 0.28  | -0.71  | 0.25  | 0.23  | 0.07  | 0.35  |      |
|      | VIII   | -3.52 | 2.41  | -1.46 | 0.20  | -9.73  | 2.67  | 0.30  | 0.16  | 5.05  |      |
|      | Summer | I     | -0.04 | 0.05  | -0.92 | 0.39   | -0.18 | 0.08  | 0.14  | -0.03 | 0.06 |
|      |        | II    | 2.06  | 4.44  | 0.46  | 0.66   | -9.35 | 13.49 | 0.04  | -0.15 | 2.05 |
| III  |        | -2.24 | 2.47  | -0.90 | 0.41  | -8.62  | 4.12  | 0.14  | -0.03 | 2.51  |      |
| IV   |        | -0.23 | 0.31  | -0.76 | 0.47  | -1.04  | 0.56  | 0.10  | -0.07 | 0.50  |      |
| V    |        | 0.71  | 0.28  | 2.51  | 0.05  | -0.01  | 1.43  | 0.46  | 0.42  | 0.41  |      |
| VI   |        | -5.49 | 2.02  | -2.58 | 0.04  | -10.42 | -0.02 | 0.57  | 0.49  | 2.57  |      |
| VII  |        | -0.23 | 0.29  | -0.78 | 0.46  | -0.98  | 0.52  | 0.11  | -0.07 | 0.37  |      |
| VIII |        | -6.46 | 1.83  | -3.29 | 0.02  | -10.73 | -1.32 | 0.68  | 0.62  | 3.38  |      |

**Table S2: Linear regression results between the precipitation and the glacier area change**

|        | Zone | Coefficient (km <sup>2</sup> /mm) | Standard error | t-values | p-values | 95% LCL | 95% UCL | R <sup>2</sup> | Adjusted R <sup>2</sup> | RSE  |
|--------|------|-----------------------------------|----------------|----------|----------|---------|---------|----------------|-------------------------|------|
| Annual | I    | 0.07                              | 1.41           | 0.05     | 0.96     | -3.55   | 3.68    | 0.31           | 0.20                    | 0.07 |
|        | II   | -12.68                            | 15.75          | -0.81    | 0.46     | -53.18  | 27.81   | 0.11           | -0.06                   | 1.98 |
|        | III  | 15.68                             | 11.96          | 1.31     | 0.25     | -15.06  | 46.42   | 0.26           | 0.11                    | 2.34 |
|        | IV   | 1.89                              | 11.05          | 0.17     | 0.87     | -26.52  | 30.30   | 0.01           | -0.19                   | 0.53 |
|        | V    | 31.56                             | 12.71          | 2.48     | 0.06     | -1.10   | 64.22   | 0.55           | 0.46                    | 0.42 |
|        | VI   | 121.06                            | 112.48         | 1.08     | 0.33     | -168.07 | 410.19  | 0.19           | 0.03                    | 3.54 |
|        | VII  | 6.92                              | 16.90          | 0.41     | 0.70     | -36.54  | 50.37   | 0.03           | -0.16                   | 0.39 |
|        | VIII | 75.08                             | 51.02          | 1.47     | 0.20     | -56.08  | 206.24  | 0.30           | 0.16                    | 5.04 |
| Fall   | I    | 1.34                              | 3.53           | 0.38     | 0.72     | -7.75   | 10.42   | 0.03           | -0.17                   | 0.07 |
|        | II   | 0.87                              | 5.18           | 0.02     | 0.99     | -13.84  | 13.58   | 0.01           | -0.20                   | 2.10 |
|        | III  | 15.12                             | 39.43          | 0.38     | 0.72     | -86.24  | 116.47  | 0.03           | -0.17                   | 2.67 |
|        | IV   | 49.18                             | 59.88          | 0.82     | 0.45     | -104.73 | 203.10  | 0.12           | -0.06                   | 0.50 |
|        | V    | 9.71                              | 23.16          | 0.42     | 0.69     | -49.83  | 69.24   | 0.03           | -0.16                   | 0.61 |

|        |      |         |        |       |      |         |        |      |       |      |
|--------|------|---------|--------|-------|------|---------|--------|------|-------|------|
|        | VI   | -114.08 | 262.20 | -0.44 | 0.68 | -788.10 | 559.93 | 0.04 | -0.16 | 3.86 |
|        | VII  | -7.17   | 30.17  | -0.24 | 0.82 | -84.72  | 70.39  | 0.01 | -0.19 | 0.40 |
|        | VIII | -266.96 | 266.38 | -1.00 | 0.36 | -951.72 | 417.79 | 0.17 | 0.00  | 5.50 |
| Winter | I    | 15.34   | 11.72  | 1.31  | 0.25 | -14.78  | 45.47  | 0.26 | 0.11  | 0.06 |
|        | II   | 84.29   | 47.43  | 1.78  | 0.14 | -37.63  | 206.20 | 0.39 | 0.26  | 1.65 |
|        | III  | 136.09  | 69.90  | 1.95  | 0.11 | -43.59  | 315.76 | 0.43 | 0.32  | 2.05 |
|        | IV   | 45.67   | 64.56  | 0.71  | 0.51 | -120.28 | 211.63 | 0.09 | -0.09 | 0.51 |
|        | V    | 59.82   | 129.32 | 0.46  | 0.66 | -272.60 | 392.24 | 0.04 | -0.15 | 0.61 |
|        | VI   | -131.91 | 203.95 | -0.65 | 0.55 | -656.19 | 392.37 | 0.08 | -0.11 | 3.77 |
|        | VII  | 169.48  | 233.29 | 0.73  | 0.50 | -430.20 | 769.16 | 0.10 | -0.09 | 0.38 |
|        | VIII | 97.08   | 84.87  | 1.14  | 0.30 | -121.10 | 315.25 | 0.21 | 0.05  | 5.37 |
| Spring | I    | -1.38   | 3.03   | -0.45 | 0.67 | -9.17   | 6.42   | 0.04 | -0.15 | 0.07 |
|        | II   | -78.33  | 54.44  | -1.44 | 0.21 | -218.26 | 61.60  | 0.29 | 0.15  | 1.77 |
|        | III  | 118.31  | 52.52  | 2.25  | 0.07 | -16.71  | 253.32 | 0.51 | 0.40  | 1.91 |
|        | IV   | -37.59  | 20.33  | -1.85 | 0.12 | -89.86  | 14.67  | 0.41 | 0.29  | 0.41 |
|        | V    | -81.17  | 29.89  | -2.72 | 0.04 | -158.00 | -4.33  | 0.60 | 0.52  | 0.39 |
|        | VI   | 260.81  | 111.23 | 2.32  | 0.07 | -28.12  | 543.75 | 0.52 | 0.42  | 2.73 |
|        | VII  | 13.66   | 60.05  | 0.23  | 0.83 | -140.72 | 168.03 | 0.01 | -0.19 | 0.40 |
|        | VIII | 152.25  | 41.67  | 3.65  | 0.01 | 45.13   | 259.37 | 0.73 | 0.67  | 3.15 |
| Summer | I    | -0.06   | 2.63   | -0.02 | 0.98 | -6.83   | 6.71   | 0.01 | -0.20 | 0.07 |
|        | II   | -23.26  | 18.94  | -1.23 | 0.27 | -71.93  | 25.42  | 0.23 | 0.08  | 1.84 |
|        | III  | 20.17   | 22.24  | 0.91  | 0.41 | -37.01  | 77.35  | 0.14 | -0.03 | 2.51 |
|        | IV   | 7.93    | 12.44  | 0.64  | 0.55 | -24.06  | 39.92  | 0.08 | -0.11 | 0.51 |
|        | V    | -25.24  | 14.99  | -1.68 | 0.15 | -63.77  | 13.28  | 0.36 | 0.23  | 0.50 |
|        | VI   | 108.31  | 214.03 | 0.51  | 0.63 | -441.87 | 658.48 | 0.05 | -0.14 | 3.83 |
|        | VII  | 14.02   | 23.01  | 0.61  | 0.57 | -45.14  | 73.17  | 0.07 | -0.12 | 0.39 |
|        | VIII | -163.77 | 95.44  | -1.72 | 0.15 | -409.09 | 81.56  | 0.37 | 0.24  | 4.79 |
